# Supplementary material
Source: HighWire-hosted journal article supplement (https://bmjopen.bmj.com/content/8/6/e020220)
Supplement: inline-supplementary-material-3 [file inline-supplementary-material-3.pdf]

**Supplementary data material 3, Table S1.** Number of attempts by tercile successive periods.

|               | Ultrasound-guided<br>method | p*      |               | Landmark method | p*       |
|---------------|-----------------------------|---------|---------------|-----------------|----------|
|               | median [IQR]                |         |               | median [IQR]    |          |
|               |                             | p=0.272 |               |                 | p= 0.306 |
| Period 1 n=19 | 3 [1-6.5]                   |         | Period 1 n=19 | 3[1.5-5]        |          |
| Period 2 n=19 | 1 [1-3]                     |         | Period 2 n=19 | 2[1-3.5]        |          |
| Period 3 n=18 | 2[1-3.75]                   |         | Period 3 n=19 | 2 [1-3]         |          |

\* comparisons between periods in each group were performed using the Kruskal-Wallis test for independent samples
